# Supplementary material for: Effects of temperature on bacterial microbiome composition in Ixodes scapularis ticks
Source: PubMed Central journal article supplement (PMC6528569; doi:10.1002/mbo3.719), 2018-09-21
Supplement: MBO3-8-e00719-s001.pdf [file MBO3-8-e00719-s001.pdf]

# APPENDIX: Supplemental materials

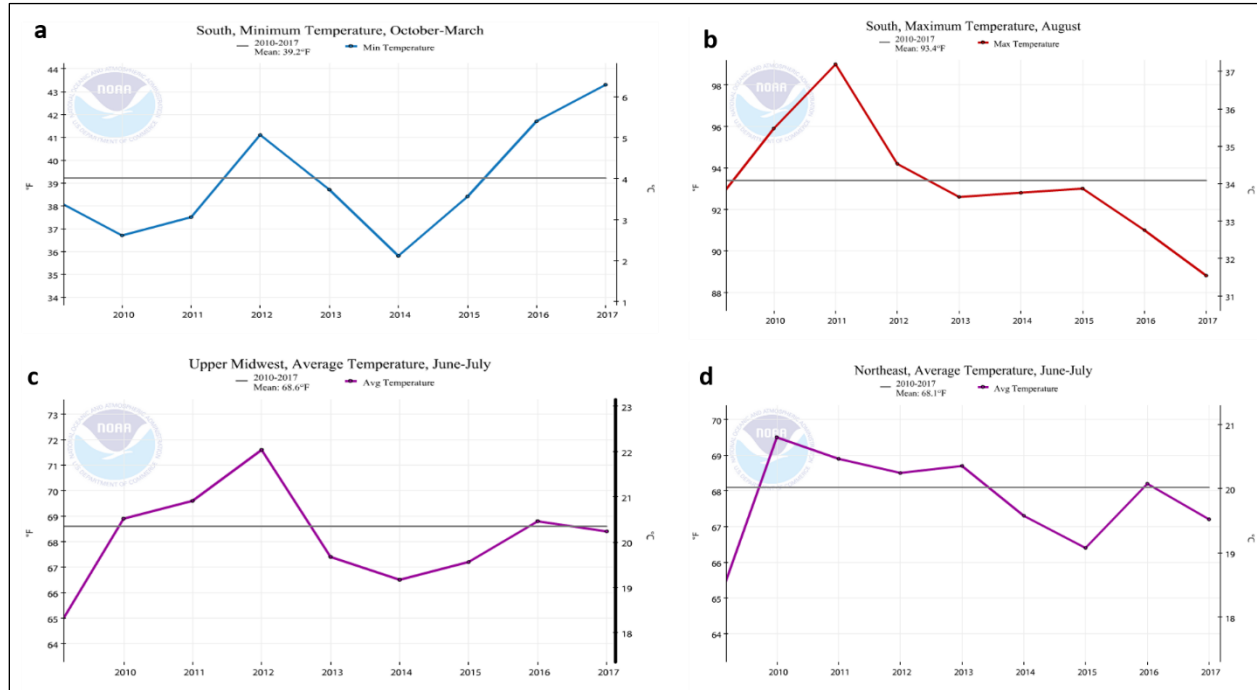

**Figure S1**

Temperatures in Upper Midwest, Northeast and South US Climatic Regions during 2010-2017.

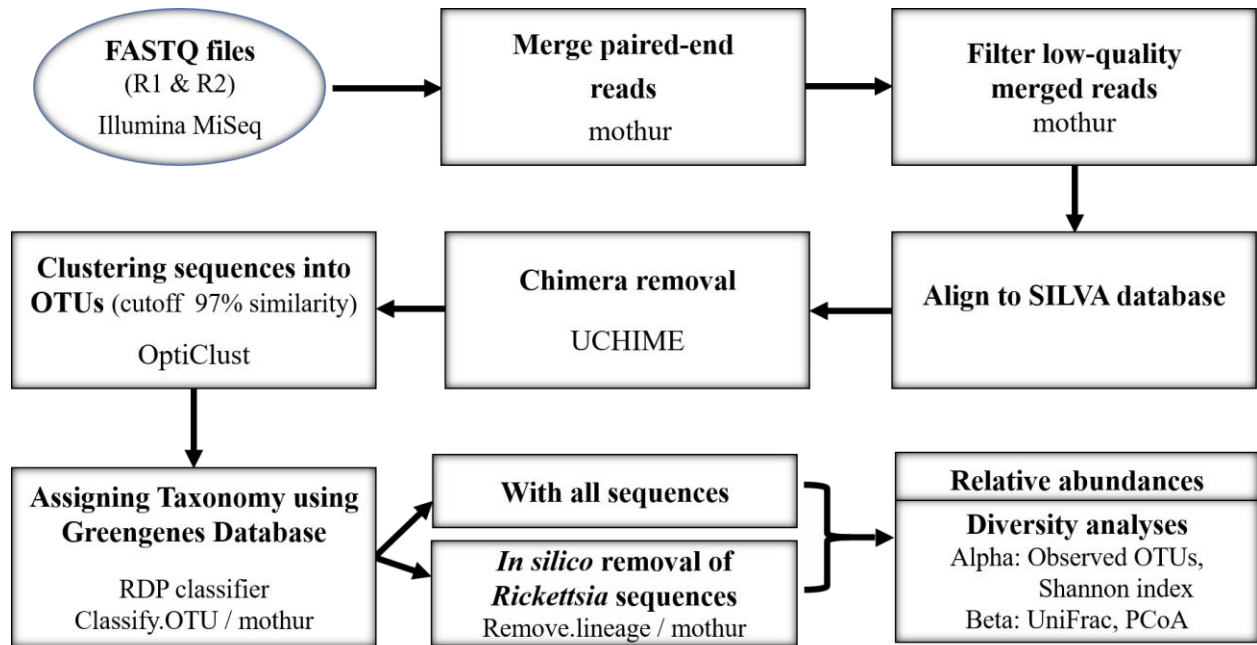

**Figure S2**

Bioinformatics workflow for processing of 16S rRNA gene sequences.

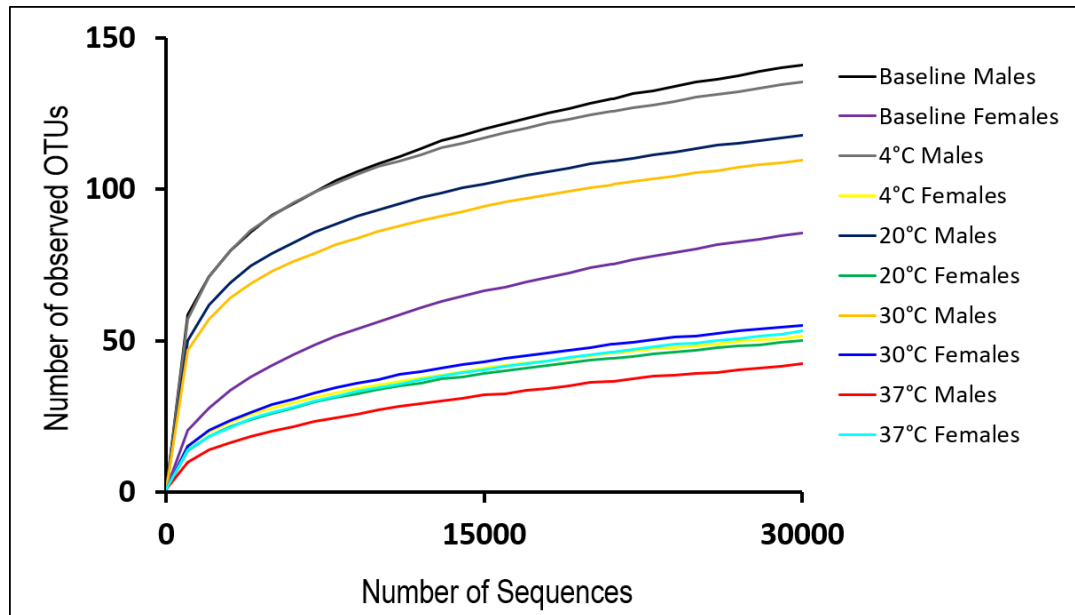

**Figure S3**

Rarefaction curves of observed OTUs versus increasing number of sequence. The curves represent the average of 30 iterations sampled every 1,000 sequences starting from 1,000 to 30,000 sequences.

**Table S1**

Good's Coverage and other measures of alpha diversity per gender at baseline and various temperatures. (ACE= abundance-based coverage estimator; BL= baseline ticks; 4C, 20C, 30C and 37C denotes the ticks incubated at 4°C, 20°C, 30°C and 37°C temperatures respectively; m= male; f= female)

| <b>Sample ID</b>           | <b>Good's Coverage (%)</b> | <b>ACE value</b> | <b>Inverse Simpson index</b> |
|----------------------------|----------------------------|------------------|------------------------------|
| <i>I. scapularis</i> males |                            |                  |                              |
| BLmTK1                     | 99.05                      | 161.74           | 11.83                        |
| BLmTK2                     | 99.34                      | 110.76           | 14.96                        |
| BLmTK3                     | 99.37                      | 108.41           | 11.18                        |
| BLmTK4                     | 99.28                      | 108.94           | 7.25                         |
| BLmTK5                     | 98.96                      | 179.29           | 4.53                         |
| 4CmTK1                     | 98.88                      | 167.19           | 12.10                        |
| 4CmTK2                     | 99.12                      | 136.10           | 8.54                         |
| 4CmTK3                     | 99.16                      | 126.22           | 12.13                        |
| 4CmTK4                     | 98.85                      | 160.35           | 13.00                        |
| 4CmTK5                     | 99.13                      | 130.61           | 7.36                         |
| 4CmTK6                     | 99.28                      | 134.78           | 2.52                         |
| 4CmTK7                     | 99.31                      | 112.04           | 6.22                         |
| 4CmTK8                     | 99.15                      | 123.94           | 6.10                         |
| 4CmTK9                     | 99.39                      | 104.11           | 3.45                         |
| 20CmTK1                    | 99.16                      | 124.06           | 5.96                         |
| 20CmTK2                    | 99.37                      | 112.54           | 3.14                         |
| 20CmTK3                    | 99.12                      | 137.49           | 5.41                         |
| 20CmTK4                    | 99.37                      | 100.84           | 6.83                         |
| 20CmTK5                    | 99.44                      | 87.40            | 4.36                         |
| 20CmTK6                    | 99.23                      | 111.54           | 5.13                         |
| 20CmTK7                    | 99.21                      | 117.62           | 4.63                         |
| 20CmTK8                    | 99.29                      | 114.04           | 4.60                         |
| 20CmTK9                    | 99.18                      | 125.35           | 5.52                         |
| 20CmTK10                   | 99.28                      | 108.42           | 6.90                         |
| 30CmTK1                    | 99.20                      | 120.70           | 4.93                         |
| 30CmTK2                    | 99.24                      | 116.03           | 4.80                         |
| 30CmTK3                    | 99.33                      | 102.66           | 6.17                         |
| 30CmTK4                    | 99.37                      | 97.58            | 4.15                         |
| 30CmTK5                    | 99.31                      | 107.27           | 5.27                         |
| 30CmTK6                    | 99.32                      | 111.55           | 8.78                         |
| 30CmTK7                    | 99.19                      | 144.48           | 4.37                         |
| 30CmTK8                    | 99.32                      | 101.00           | 2.38                         |

| Sample ID                    | Good's Coverage (%) | ACE value | Inverse Simpson index |
|------------------------------|---------------------|-----------|-----------------------|
| 30CmTK9                      | 99.29               | 113.65    | 3.37                  |
| 30CmTK10                     | 99.79               | 94.79     | 1.03                  |
| 37CmTK1                      | 99.29               | 99.48     | 4.37                  |
| 37CmTK2                      | 98.86               | 199.13    | 4.63                  |
| 37CmTK3                      | 99.14               | 127.75    | 4.34                  |
| 37CmTK4                      | 99.63               | 89.99     | 1.08                  |
| 37CmTK5                      | 99.65               | 101.63    | 1.08                  |
| 37CmTK6                      | 99.90               | 49.05     | 1.01                  |
| 37CmTK7                      | 99.84               | 68.79     | 1.57                  |
| 37CmTK8                      | 99.76               | 108.37    | 1.59                  |
| 37CmTK9                      | 99.85               | 57.66     | 1.02                  |
| 37CmTK10                     | 99.86               | 45.18     | 1.02                  |
| <i>I. scapularis</i> females |                     |           |                       |
| BLfTK1                       | 99.73               | 71.12     | 1.03                  |
| BLfTK2                       | 99.76               | 64.77     | 1.04                  |
| BLfTK3                       | 98.78               | 262.57    | 1.09                  |
| BLfTK4                       | 99.80               | 61.03     | 1.02                  |
| BLfTK5                       | 99.82               | 69.76     | 1.02                  |
| 4CfTK1                       | 99.76               | 44.29     | 1.04                  |
| 4CfTK2                       | 99.75               | 46.08     | 1.05                  |
| 4CfTK3                       | 99.78               | 55.19     | 1.03                  |
| 4CfTK4                       | 99.80               | 70.48     | 1.02                  |
| 4CfTK5                       | 99.79               | 86.38     | 1.02                  |
| 4CfTK6                       | 99.72               | 88.45     | 1.05                  |
| 4CfTK7                       | 99.76               | 76.32     | 1.02                  |
| 4CfTK8                       | 99.77               | 70.66     | 1.03                  |
| 4CfTK9                       | 99.71               | 64.70     | 1.04                  |
| 4CfTK10                      | 99.67               | 68.38     | 1.21                  |
| 20CfTK1                      | 99.80               | 81.61     | 1.02                  |
| 20CfTK2                      | 1.00                | 74.64     | 1.02                  |
| 20CfTK3                      | 1.00                | 57.44     | 1.08                  |
| 20CfTK4                      | 1.00                | 69.46     | 1.03                  |
| 20CfTK5                      | 0.99                | 104.54    | 1.36                  |
| 20CfTK6                      | 1.00                | 73.63     | 1.02                  |
| 20CfTK7                      | 1.00                | 57.97     | 1.01                  |
| 20CfTK8                      | 1.00                | 62.46     | 1.07                  |
| 20CfTK9                      | 1.00                | 68.12     | 1.01                  |
| 20CfTK10                     | 1.00                | 88.11     | 1.02                  |
| 30CfTK1                      | 99.70               | 78.20     | 1.04                  |
| 30CfTK2                      | 99.92               | 11.46     | 1.01                  |
| 30CfTK3                      | 99.87               | 55.49     | 1.02                  |
| 30CfTK4                      | 99.69               | 75.31     | 1.08                  |

| <b>Sample ID</b> | <b>Good's Coverage (%)</b> | <b>ACE value</b> | <b>Inverse Simpson index</b> |
|------------------|----------------------------|------------------|------------------------------|
| 30CfTK5          | 99.64                      | 95.79            | 1.08                         |
| 30CfTK6          | 99.65                      | 88.23            | 1.07                         |
| 30CfTK7          | 99.75                      | 83.68            | 1.09                         |
| 30CfTK8          | 99.69                      | 84.36            | 1.14                         |
| 30CfTK9          | 99.69                      | 72.21            | 1.23                         |
| 30CfTK10         | 99.74                      | 64.03            | 1.36                         |
| 37CfTK1          | 99.83                      | 52.05            | 1.02                         |
| 37CfTK2          | 99.80                      | 92.15            | 1.04                         |
| 37CfTK3          | 99.68                      | 85.20            | 1.06                         |
| 37CfTK4          | 99.73                      | 94.22            | 1.04                         |
| 37CfTK5          | 99.68                      | 72.95            | 1.05                         |
| 37CfTK6          | 99.64                      | 69.71            | 1.28                         |
| 37CfTK7          | 99.79                      | 77.33            | 1.39                         |
| 37CfTK8          | 99.71                      | 75.06            | 1.72                         |
| 37CfTK9          | 99.78                      | 129.25           | 1.62                         |
| 37CfTK10         | 99.88                      | 22.16            | 1.25                         |

---

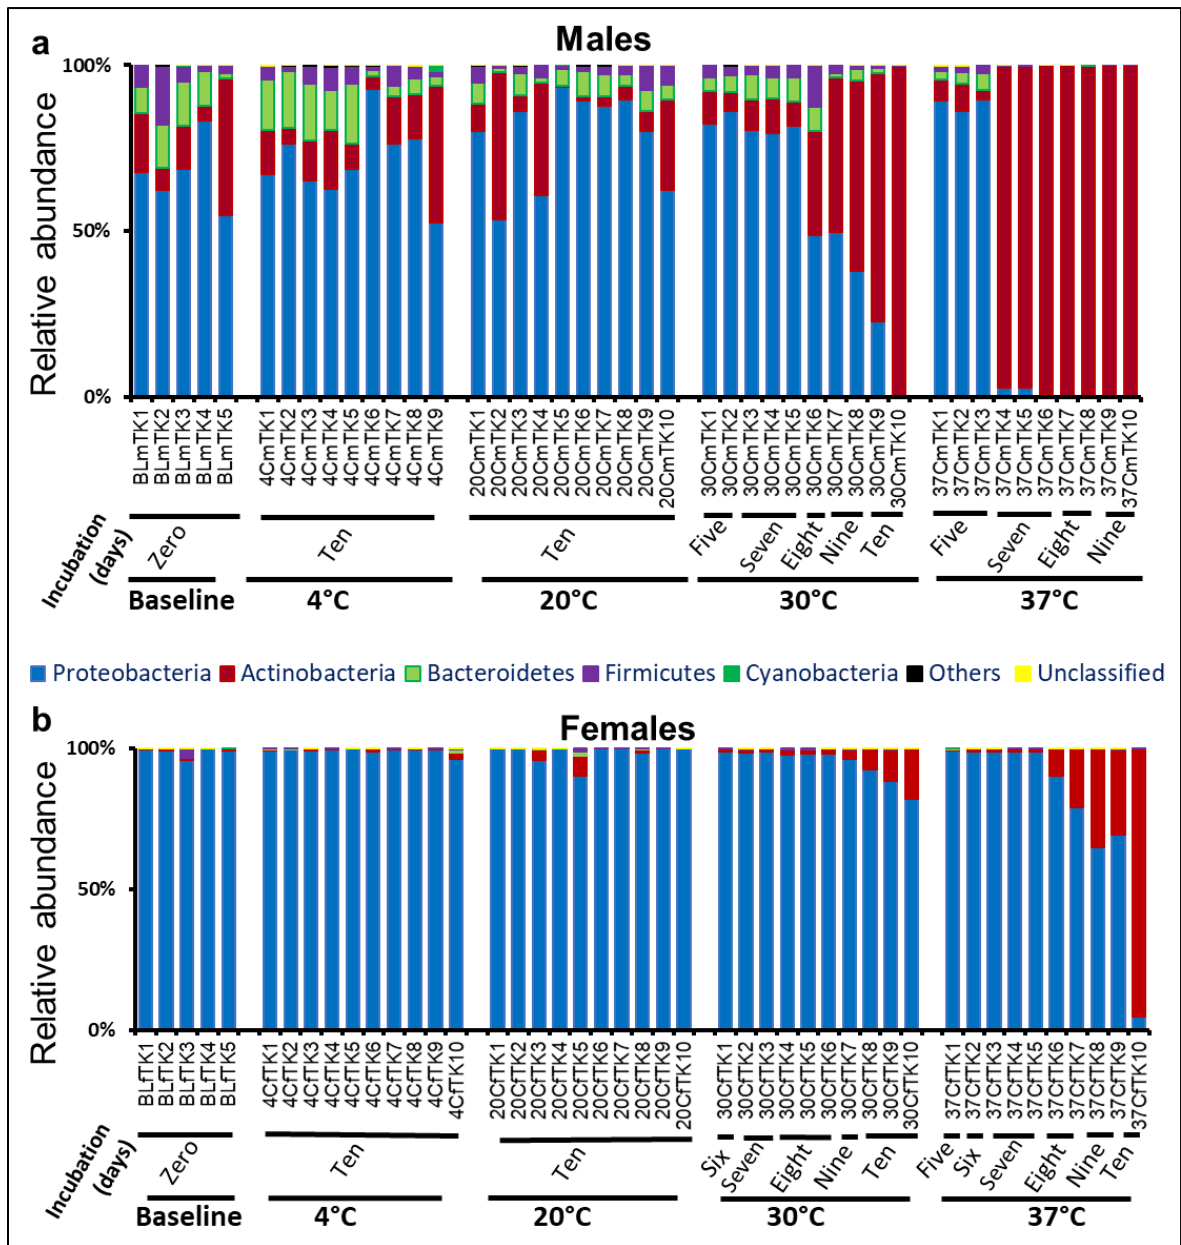

**Figure S4**

Phylum level bacterial microbiomes of *I. scapularis* male (a) and female (b) ticks. The microbiomes of both baseline and temperature-treated ticks (identified on x-axis) are shown in the stacked bar charts where each bar represents an individual tick.

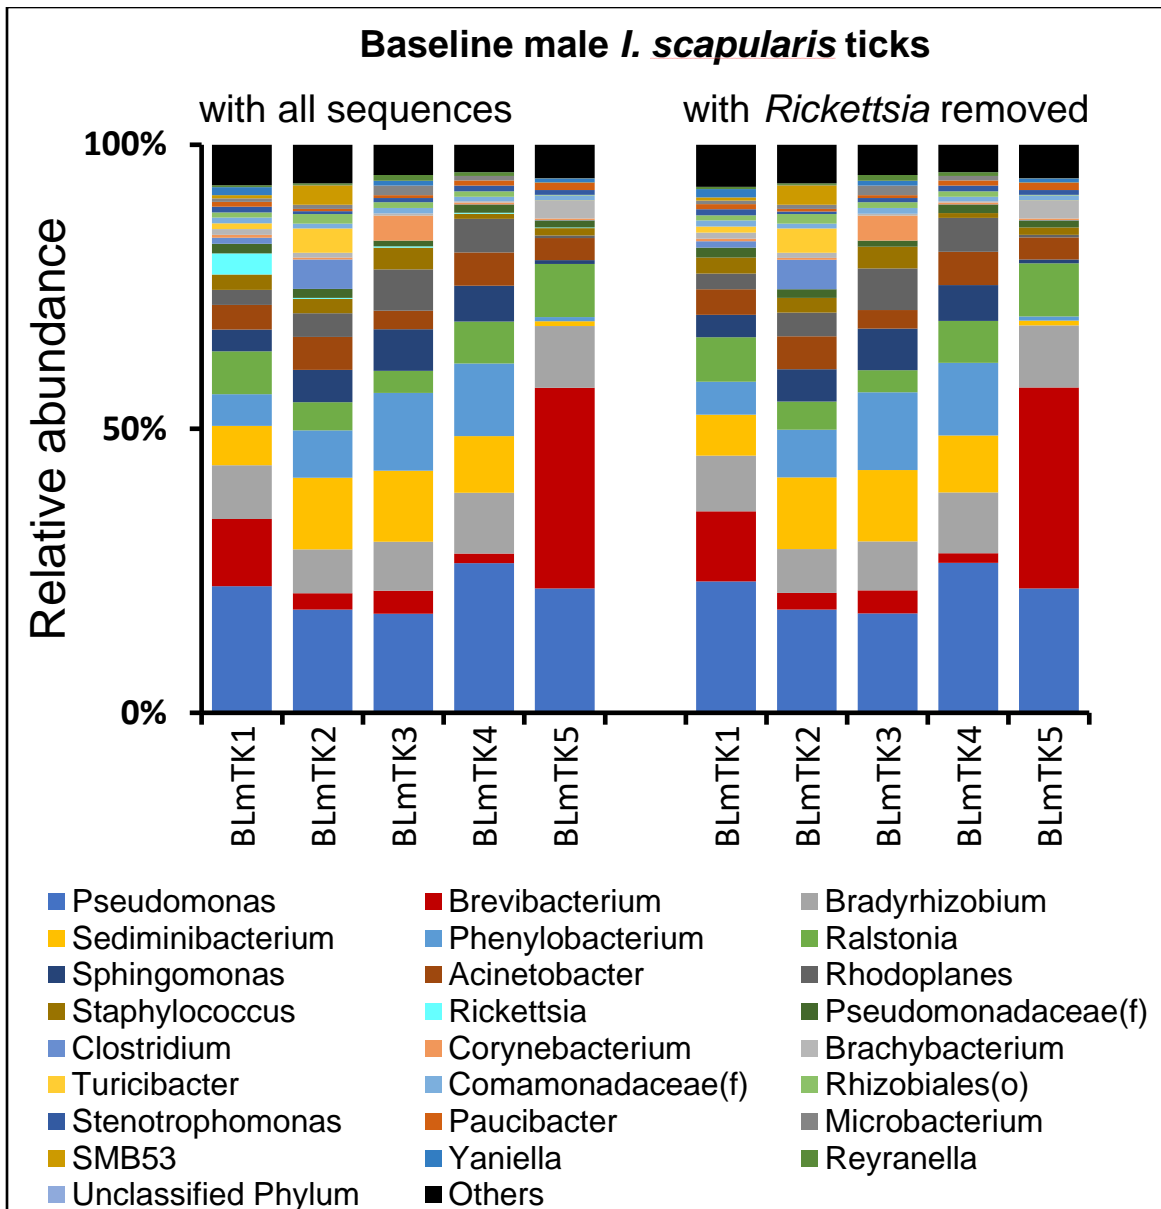

**Figure S5**

Relative abundance of bacterial taxa in colony-reared baseline *I. scapularis* males with all sequences (left panel) and with *Rickettsia* removed (right panel). Sequences with  $\geq 1\%$  relative abundance in at least one of the samples are reported individually, while remaining taxa are grouped together in an 'others' category.



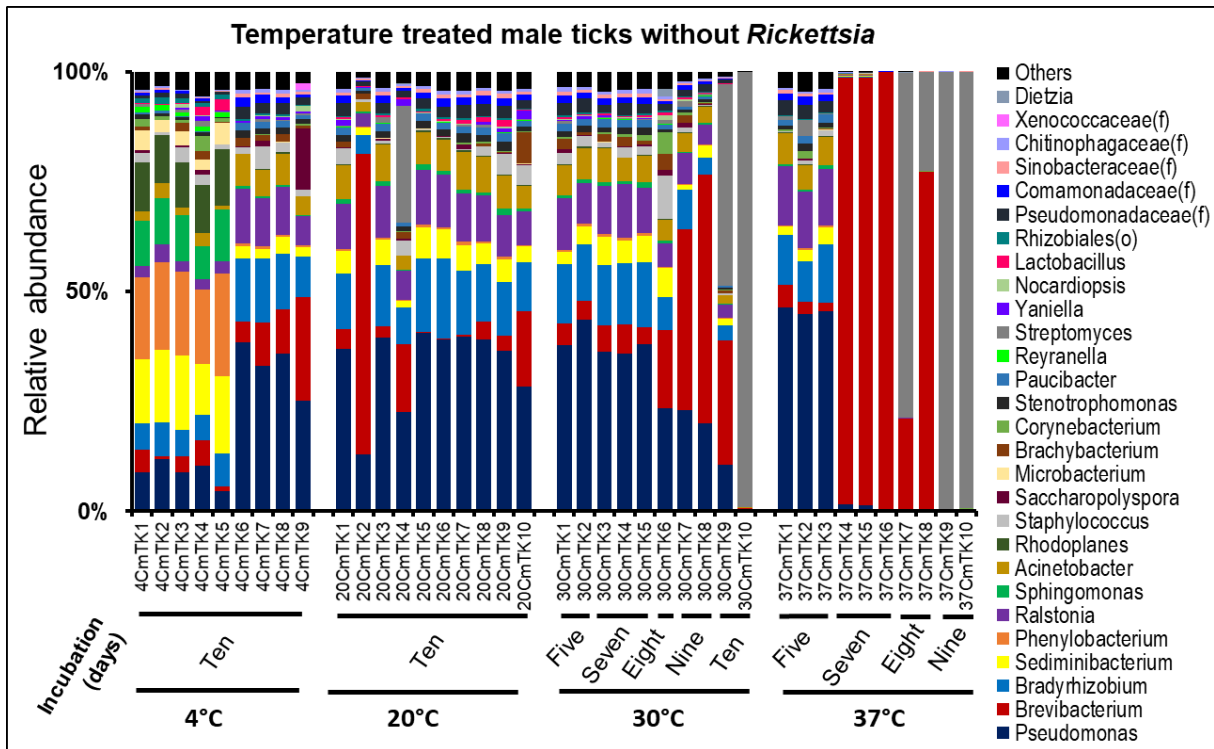

**Figure S6**

Bacterial microbiomes in male ticks shown in Fig. 3a after *in silico* removal of *Rickettsia*.

Each bar represents an individual tick sample.
